# Supplementary material for: Gold dipyrrin-bisphenolates: a combined experimental and DFT study of metal–ligand interactions
Source: Royal Society of Chemistry journal article supplement (doi:10.1039/c9ra09228e), 2020-01-01
Supplement: c9ra09228e1.pdf [file c9ra09228e1.pdf]

## Supporting Information

### Gold Dipyrin-Bisphenolates: A Combined Experimental and DFT Study of Metal-Ligand Interactions

Kolle E. Thomas, Jeanet Conradie, Nicolas Desbois, Simon J. Teat,

Claude P. Gros, and Abhik Ghosh,

#### Table of Contents

|                                                                                                                  |     |
|------------------------------------------------------------------------------------------------------------------|-----|
| <i>A. <sup>1</sup>H NMR spectra</i>                                                                              | S1  |
| <b>Figure S1.</b> <sup>1</sup> H and <sup>19</sup> F NMR spectra of <b>H<sub>3</sub>[CF<sub>3</sub>DPPOMe]</b> . | S1  |
| <b>Figure S2.</b> <sup>1</sup> H NMR spectrum of <b>H<sub>3</sub>[MeDPPOMe]</b>                                  | S2  |
| <b>Figure S3.</b> <sup>1</sup> H and <sup>19</sup> F NMR spectra of <b>H<sub>3</sub>[CF<sub>3</sub>DPP]</b>      | S3  |
| <b>Figure S4.</b> <sup>1</sup> H NMR spectrum of <b>H<sub>3</sub>[MeDPP]</b>                                     | S4  |
| <b>Figures S5.</b> NMR spectra of <b>Au[CF<sub>3</sub>DPP]</b>                                                   | S5  |
| <b>Figures S6.</b> NMR spectra of <b>Au[HDPP]</b>                                                                | S8  |
| <b>Figures S7.</b> NMR spectra of <b>Au[MeDPP]</b>                                                               | S11 |
| <i>B. Mass spectra</i>                                                                                           | S14 |
| <b>Figure S8.</b> MALDI/TOF LRMS and ESI HRMS mass spectra <b>H<sub>3</sub>[CF<sub>3</sub>DPPOMe]</b>            | S14 |
| <b>Figure S9.</b> MALDI/TOF LRMS and ESI HRMS mass spectra of <b>H<sub>3</sub>[MeDPPOMe]</b>                     | S15 |
| <b>Figure S10.</b> MALDI/TOF LRMS and ESI HRMS mass spectra of <b>H<sub>3</sub>[CF<sub>3</sub>DPP]</b>           | S16 |
| <b>Figure S11.</b> MALDI/TOF LRMS and ESI HRMS mass spectra of <b>H<sub>3</sub>[MeDPP]</b>                       | S17 |
| <b>Figure S12.</b> ESI HRMS mass spectrum of <b>Au[CF<sub>3</sub>DPP]</b> .                                      | S18 |
| <b>Figure S13.</b> ESI HRMS mass spectrum of <b>Au[HDPP]</b> .                                                   | S18 |
| <b>Figure S14.</b> ESI HRMS mass spectrum of <b>Au[MeDPP]</b> .                                                  | S19 |
| <b>Figure S15.</b> ESI HRMS mass spectrum of <b>Cu[CF<sub>3</sub>DPP]</b> .                                      | S19 |
| <i>C. Redox potentials</i>                                                                                       | S20 |
| <i>D. Optimized OLYP/STO-TZ2P coordinates</i>                                                                    | S21 |

## A. $^1\text{H}$ NMR spectra

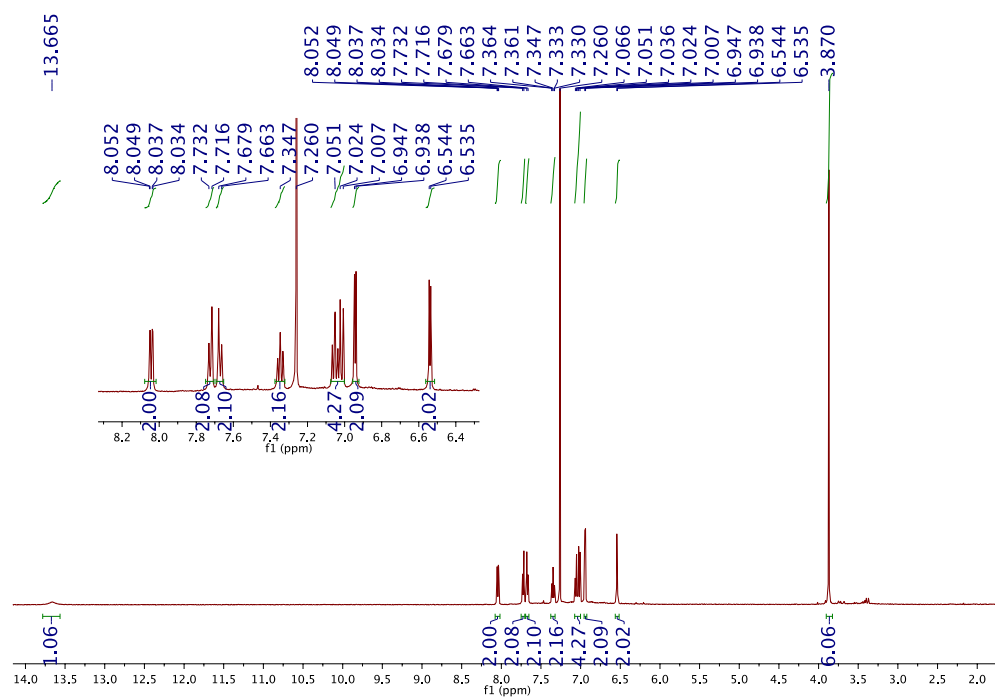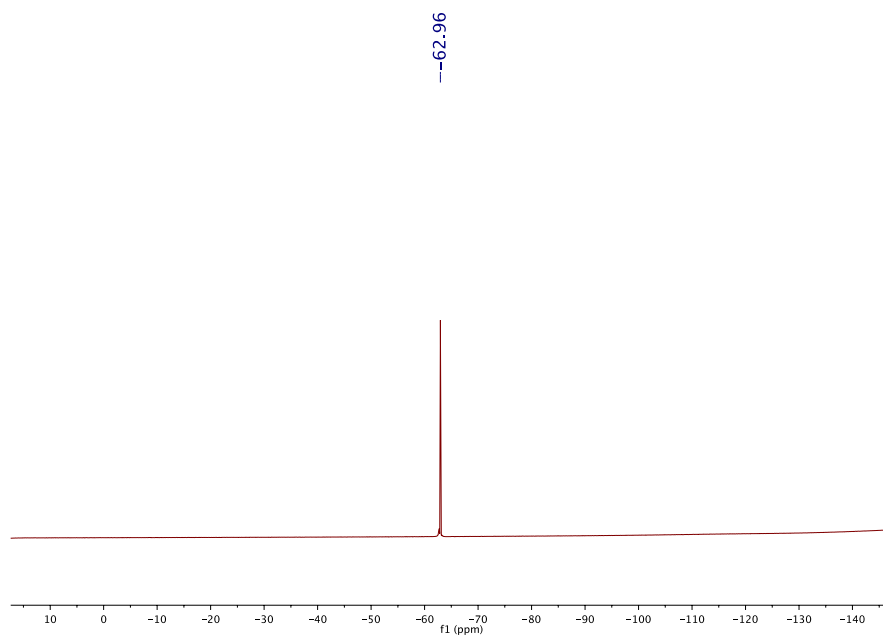

**Figure S1.**  $^1\text{H}$  (500 MHz,  $\text{CDCl}_3$ ) and  $^{19}\text{F}$  (564 MHz,  $\text{acetone-}d_6$ ) NMR spectra of  $\text{H}_3[\text{CF}_3\text{DPPOMe}]$ .

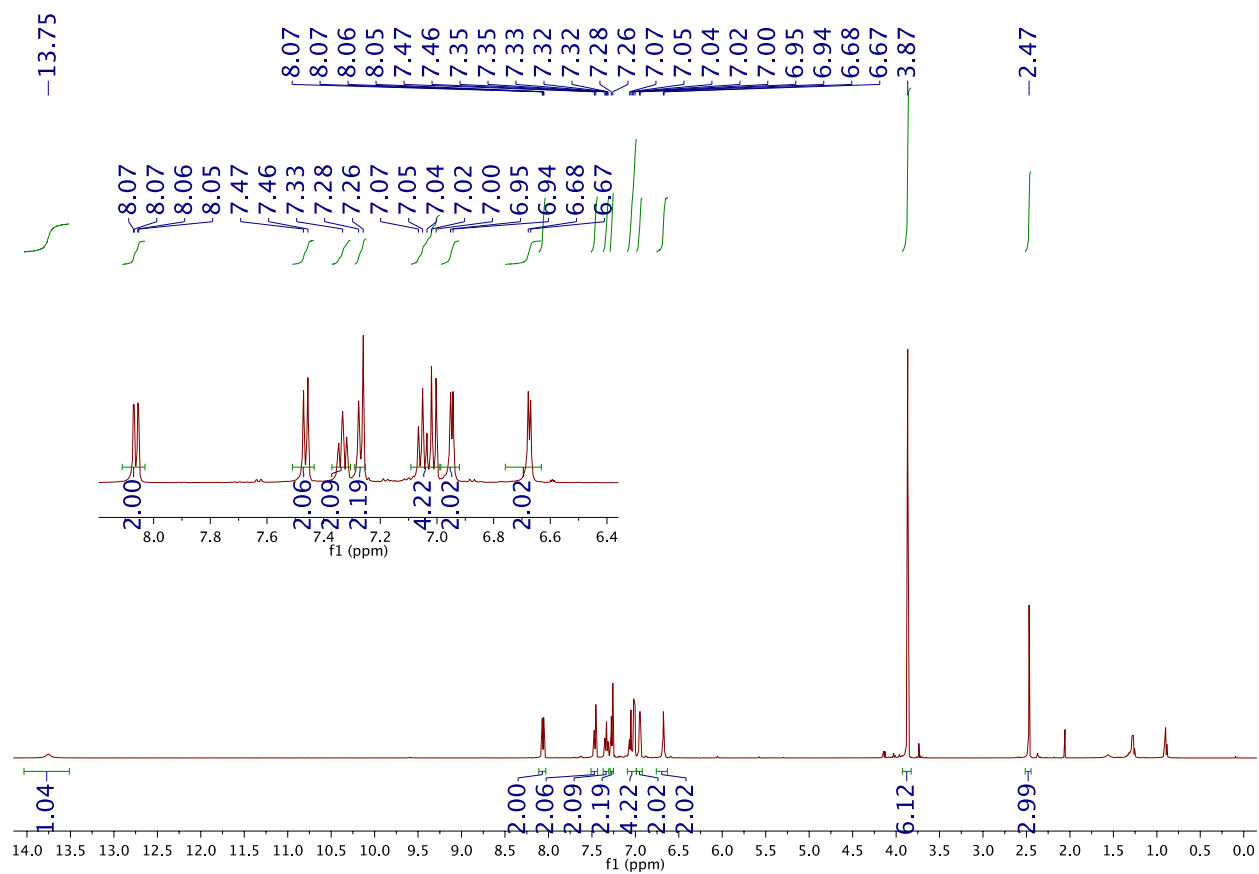

**Figure S2.**  $^1\text{H}$  NMR (500 MHz,  $\text{CDCl}_3$ ) spectrum of  $\text{H}_3[\text{MeDPPOMe}]$ .

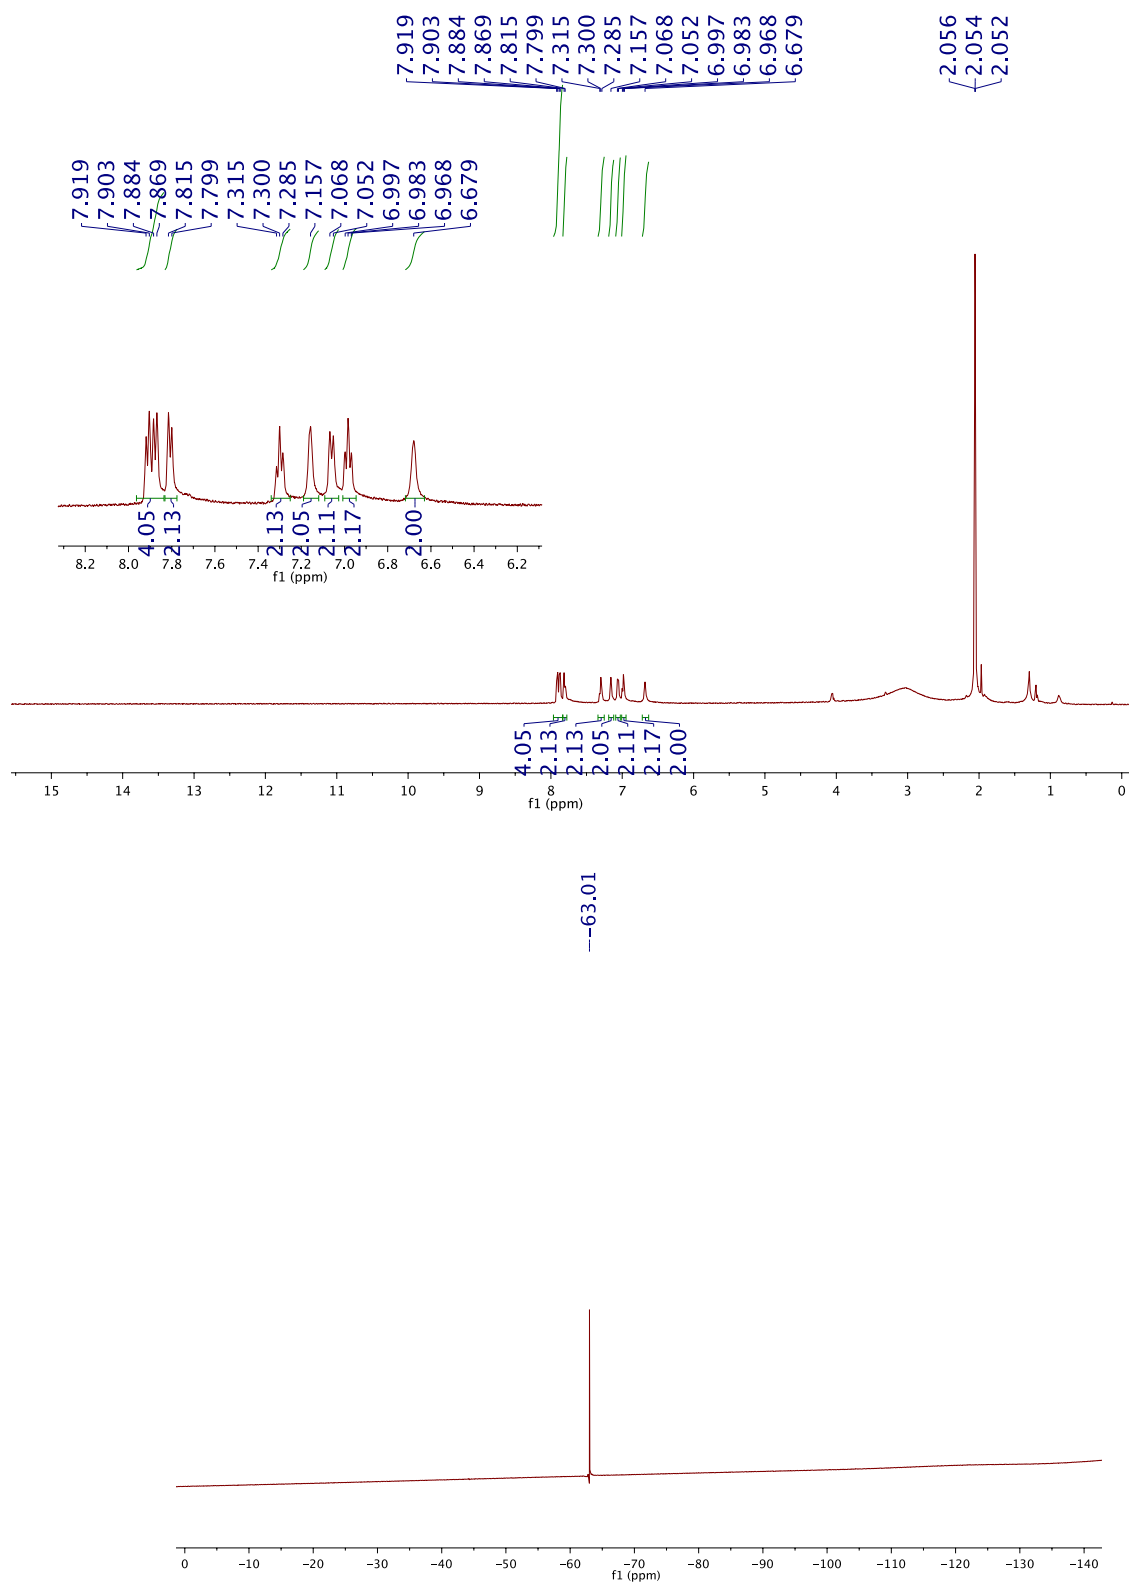

**Figure S3.**  $^1\text{H}$  (500 MHz, acetone- $d_6$ ) and  $^{19}\text{F}$  (564 MHz, acetone- $d_6$ ) NMR spectra of  $\text{H}_3[\text{CF}_3\text{DPP}]$ .

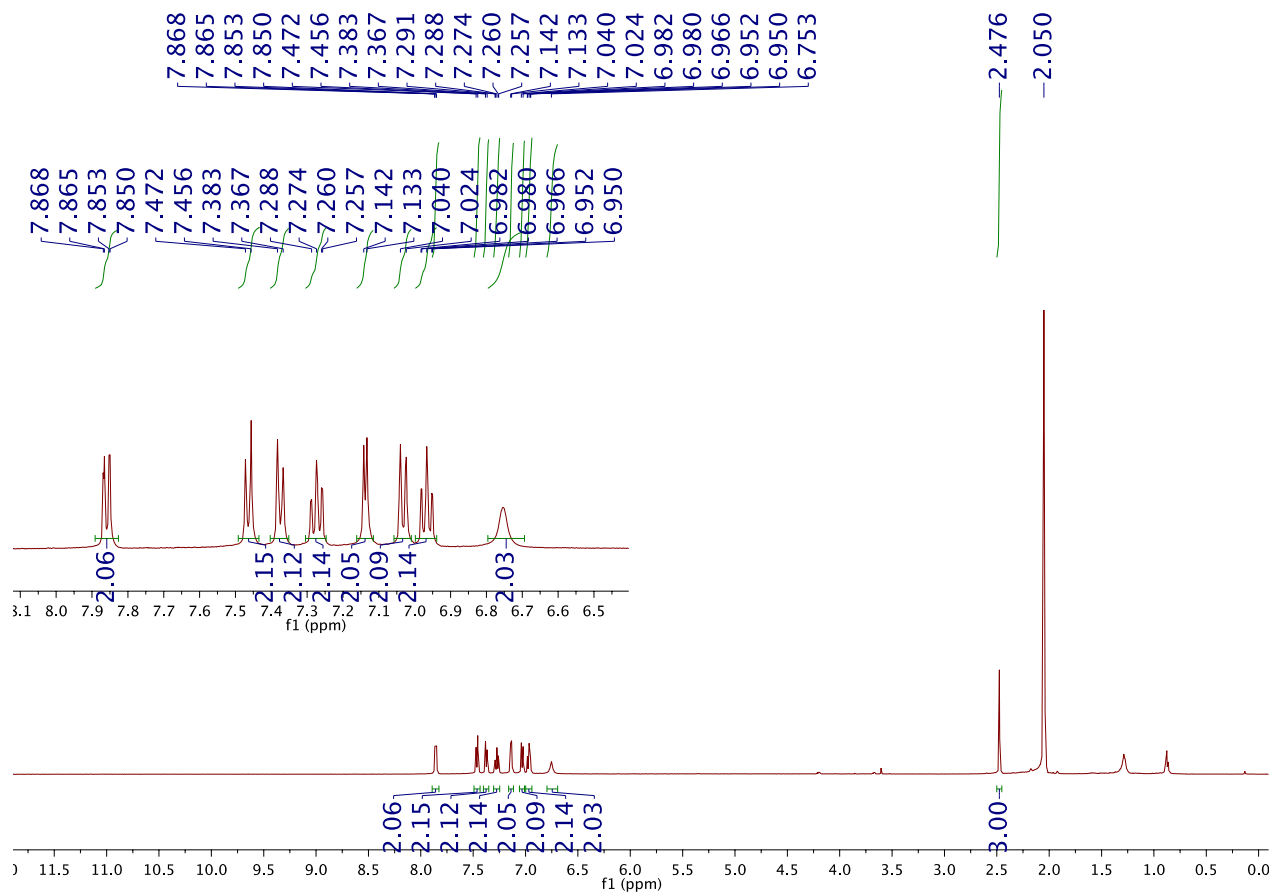

**Figure S4.**  $^1\text{H}$  NMR (500 MHz,  $\text{acetone-}d_6$ ) spectrum of  $\text{H}_3[\text{MeDPP}]$ .

(\* represents solvent impurity)

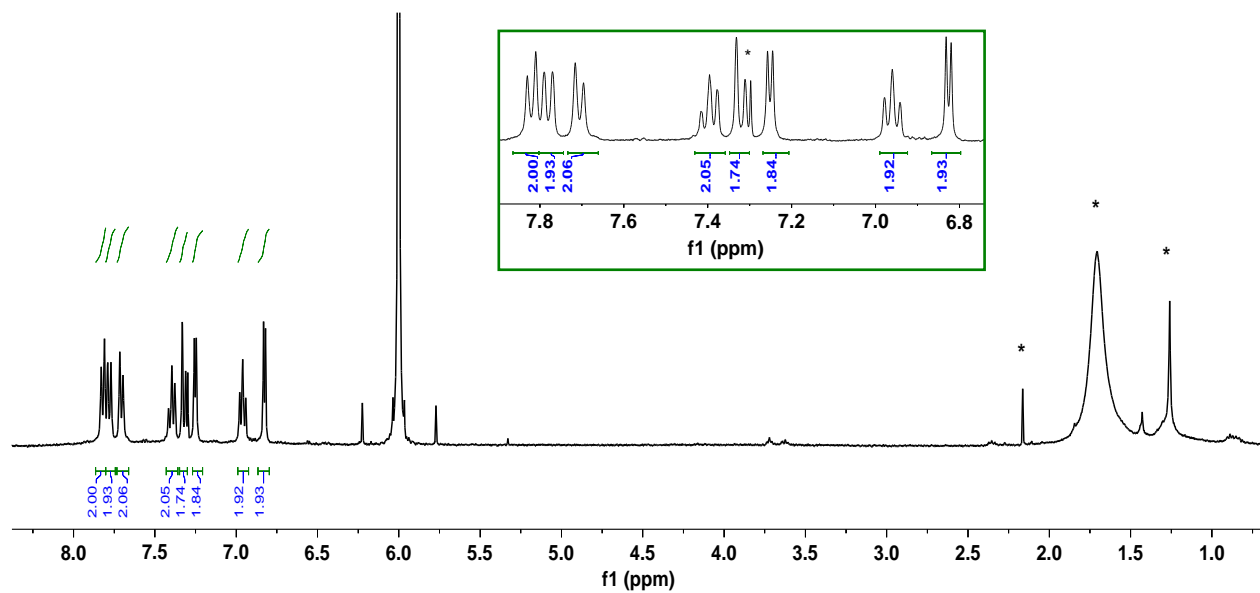

**Figure S5.1.**  $^1\text{H}$  NMR (400 MHz, 1,1,2,2-tetrachloroethane- $d_2$ ) spectrum of  $\text{Au}[\text{CF}_3\text{DPP}]$ .  
Insert: Aromatic region.

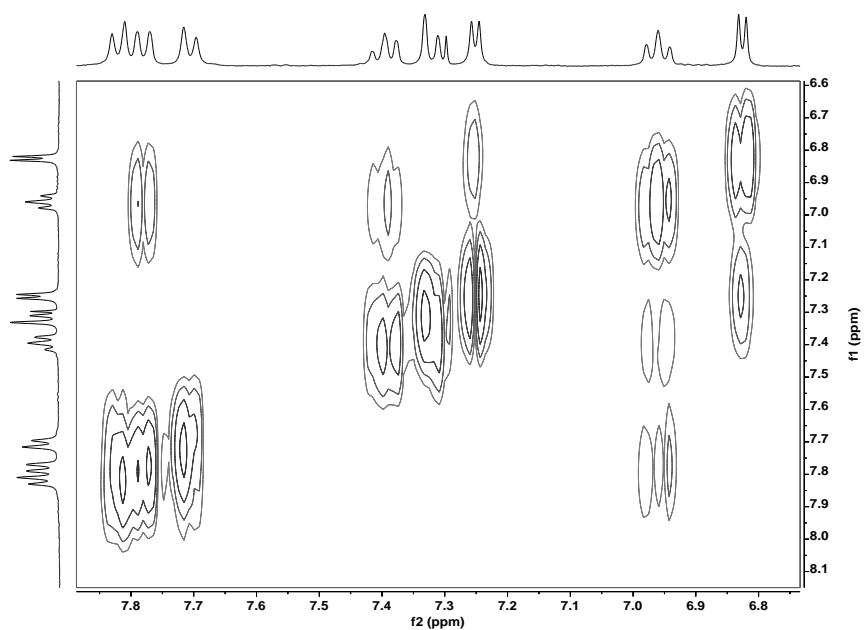

**Figure S5.2.** COSY (400 MHz, 1,1,2,2-tetrachloroethane- $d_2$ ) of  $\text{Au}[\text{CF}_3\text{DPP}]$ .

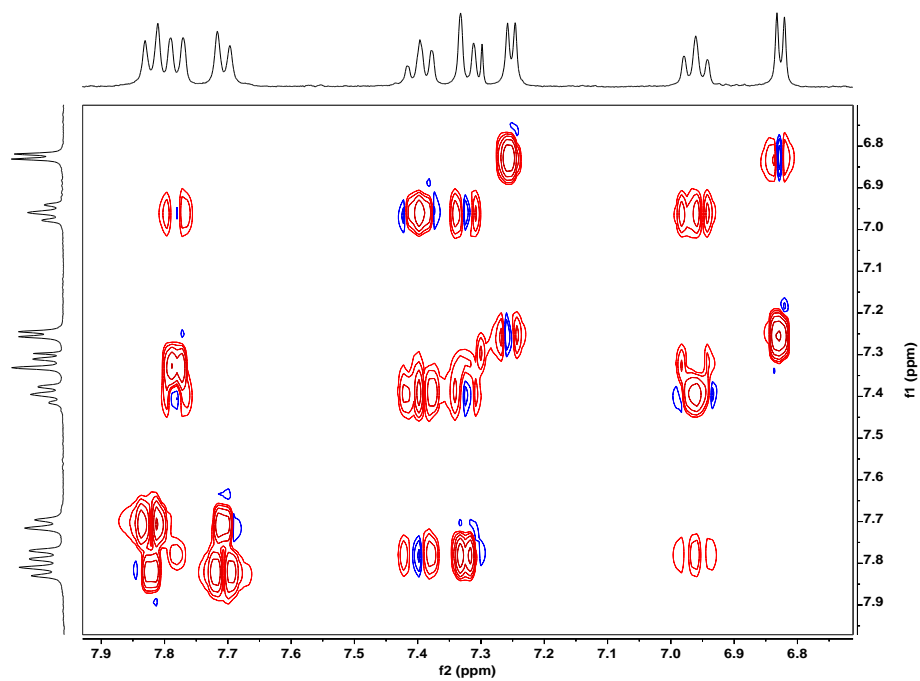

**Figure S5.3.** TOCSY (400 MHz, 1,1,2,2-tetrachloroethane-*d*<sub>2</sub>) of Au[CF<sub>3</sub>DPP].

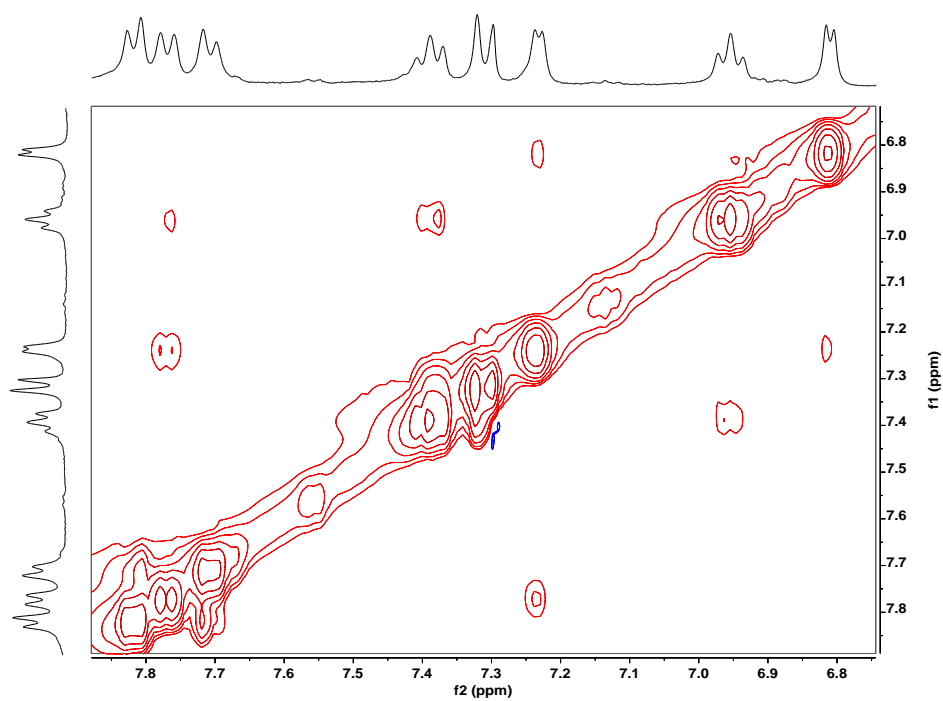

**Figure S5.4.** NOESY (400 MHz, 1,1,2,2-tetrachloroethane-*d*<sub>2</sub>) of Au[CF<sub>3</sub>DPP].

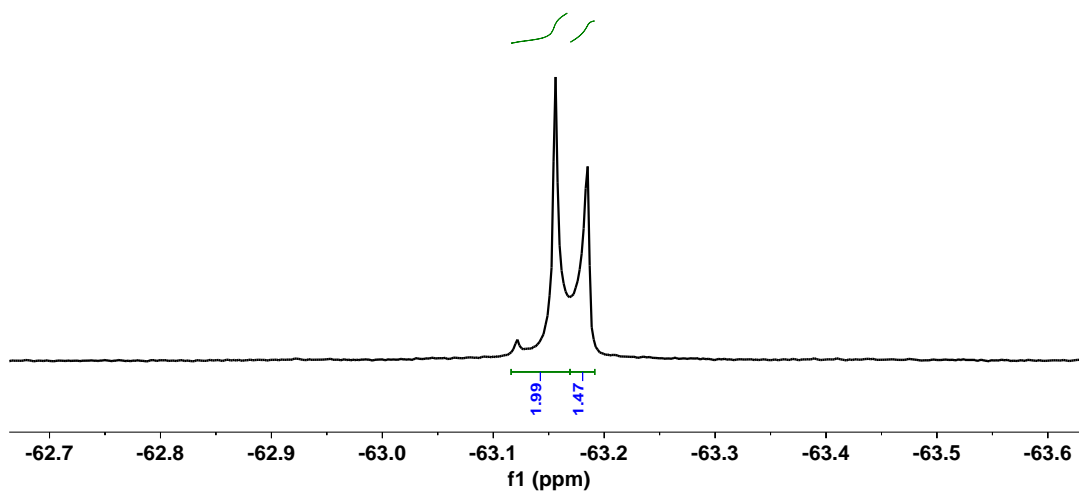

**Figure S5.5.**  $^{19}\text{F}$  NMR (376 MHz, 1,1,2,2-tetrachloroethane- $d_2$ ) spectrum of **Au[CF<sub>3</sub>DPP]**.



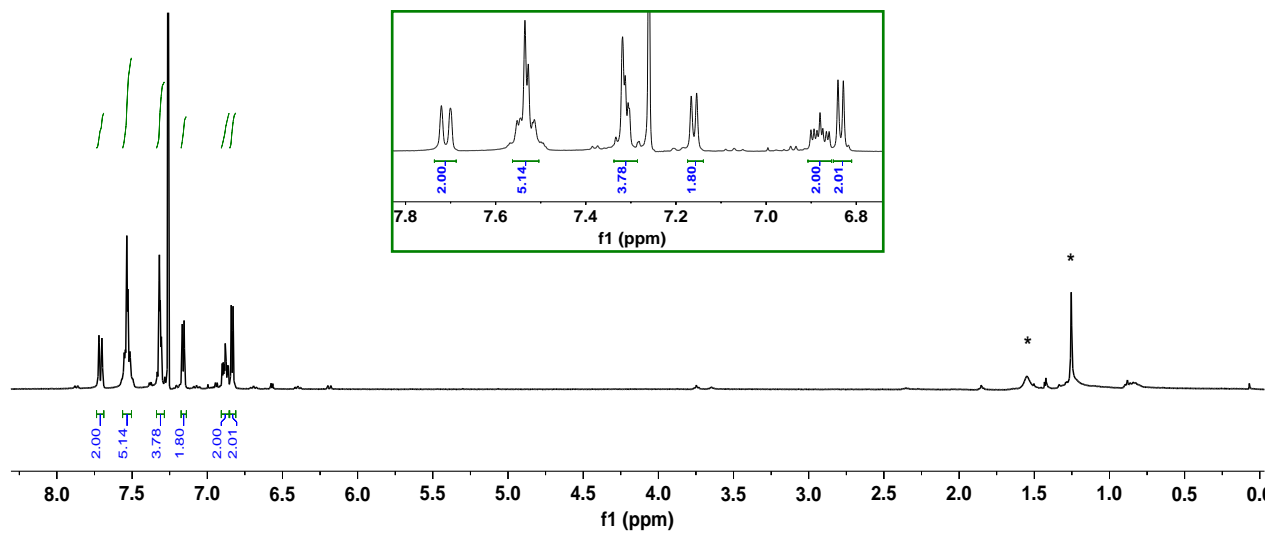

**Figure S6.1.**  $^1\text{H}$  NMR (400 MHz,  $\text{CDCl}_3$ ) spectrum of  $\text{Au}[\text{HDPP}]$ . Insert: Aromatic region.

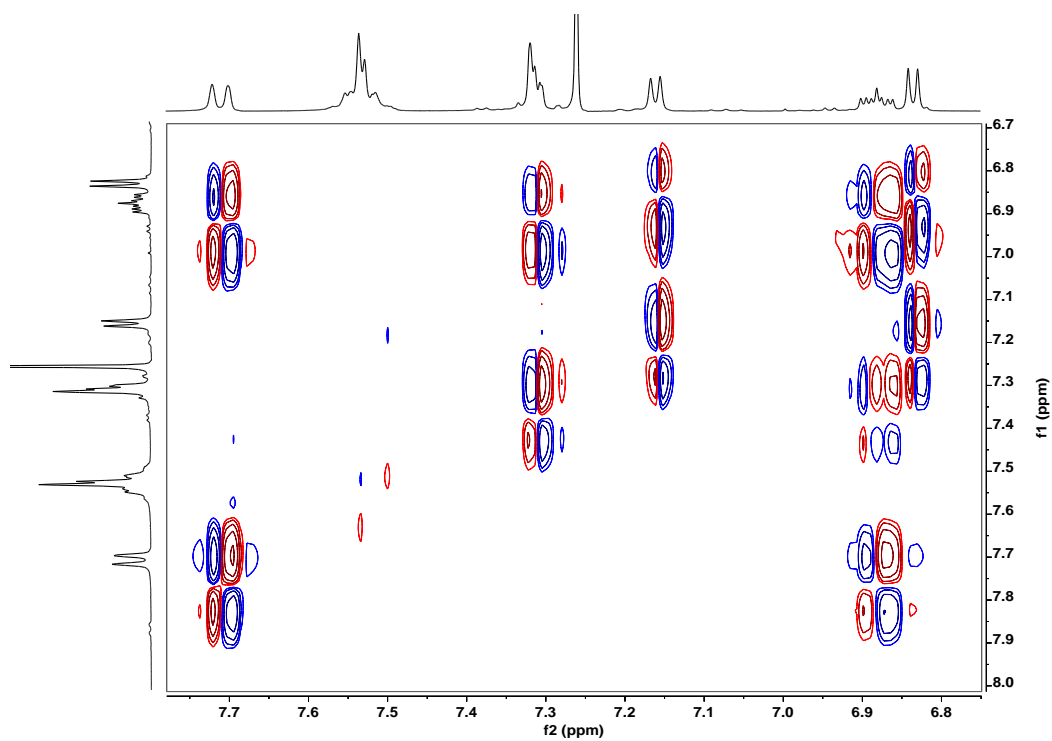

**Figure S6.2.** dqCOSY (400 MHz, CDCl<sub>3</sub>) of Au[HDPP].

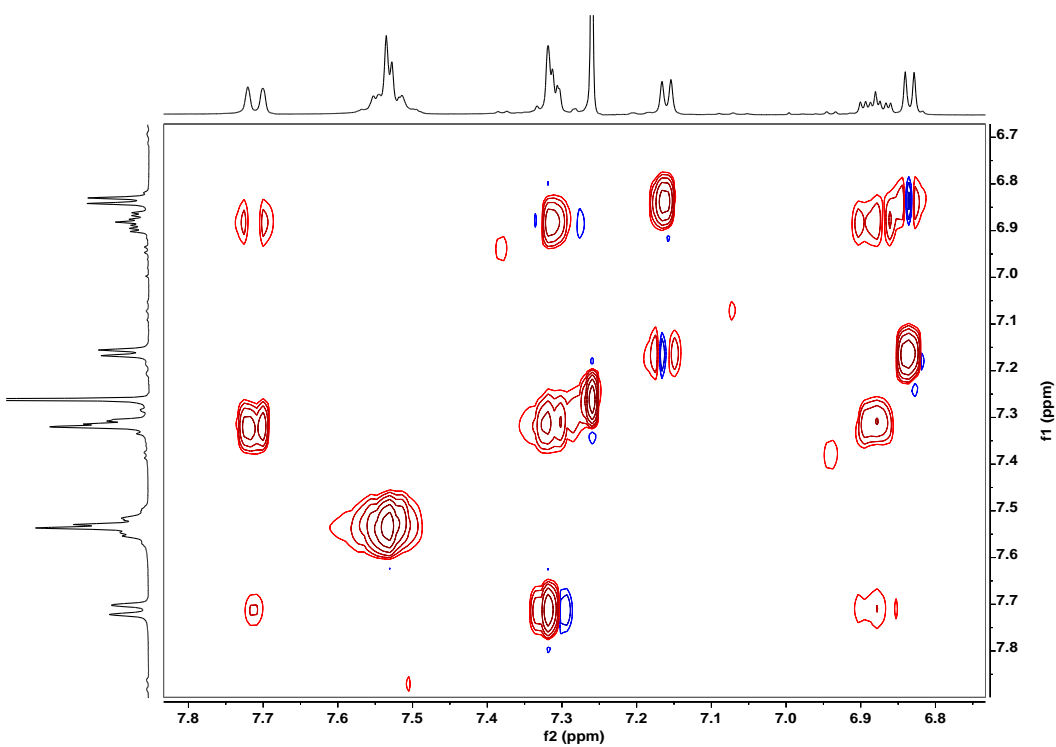

**Figure S6.3.** TOCSY (400 MHz, CDCl<sub>3</sub>) of Au[HDPP].

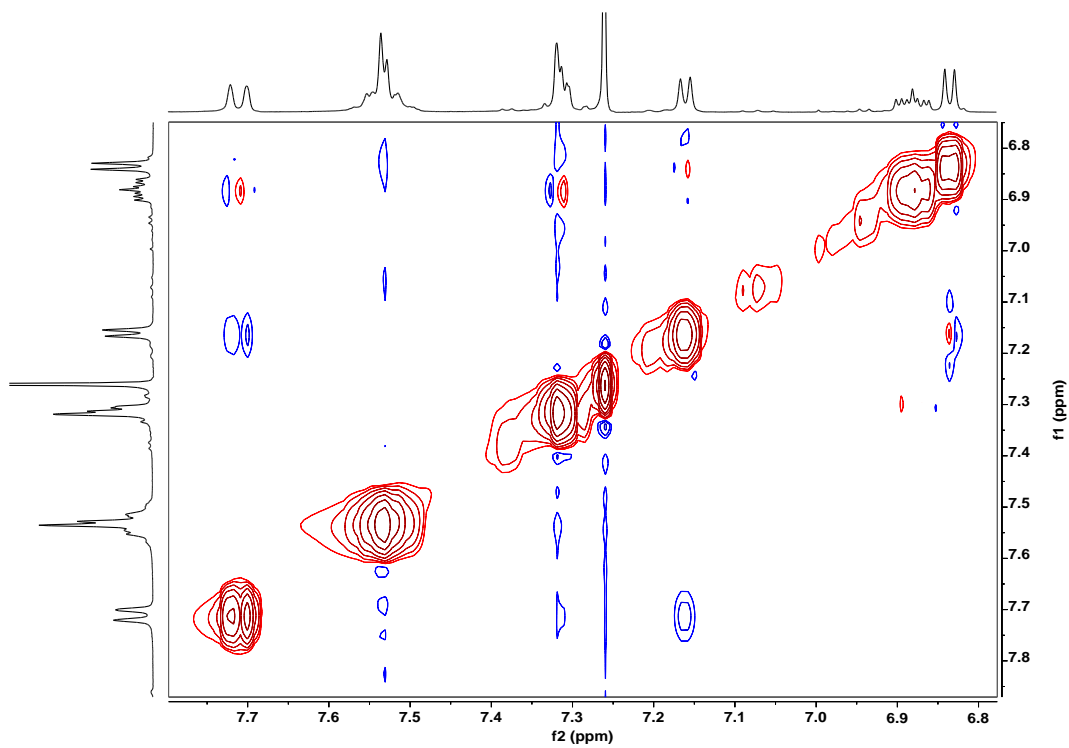

**Figure S6.4.** NOESY (400 MHz, CDCl<sub>3</sub>) of Au[HDPP].

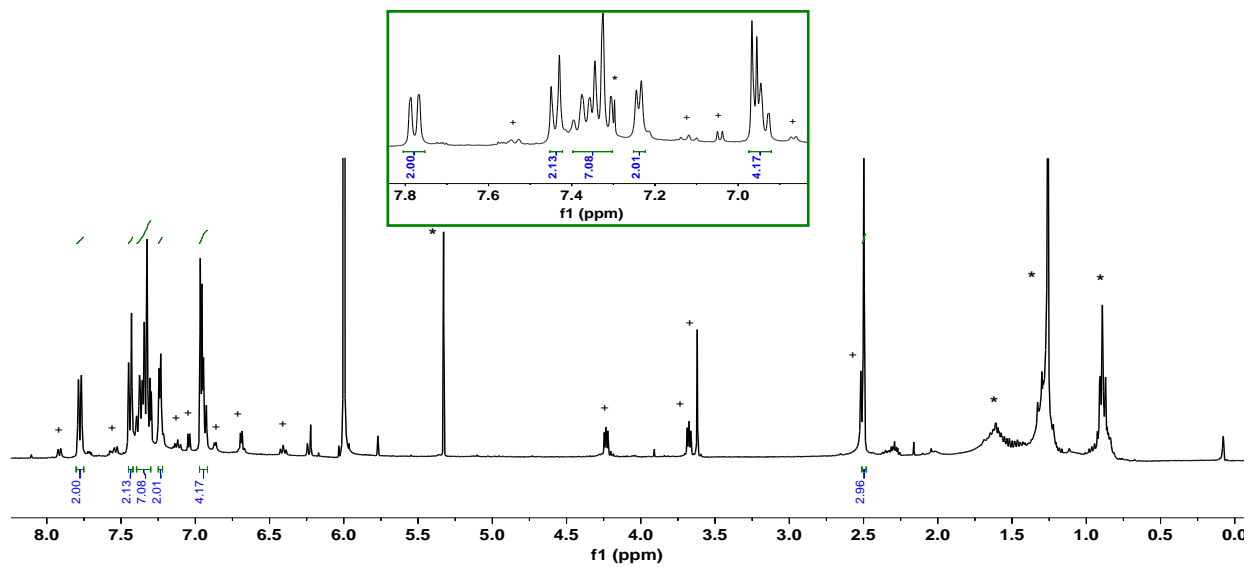

**Figure S7.1.**  $^1\text{H}$  NMR (400 MHz, 1,1,2,2-tetrachloroethane- $d_2$ ) spectrum of **Au[MeDPP]**. Insert: Aromatic region; + represents a gold dipyrin dimer impurity.

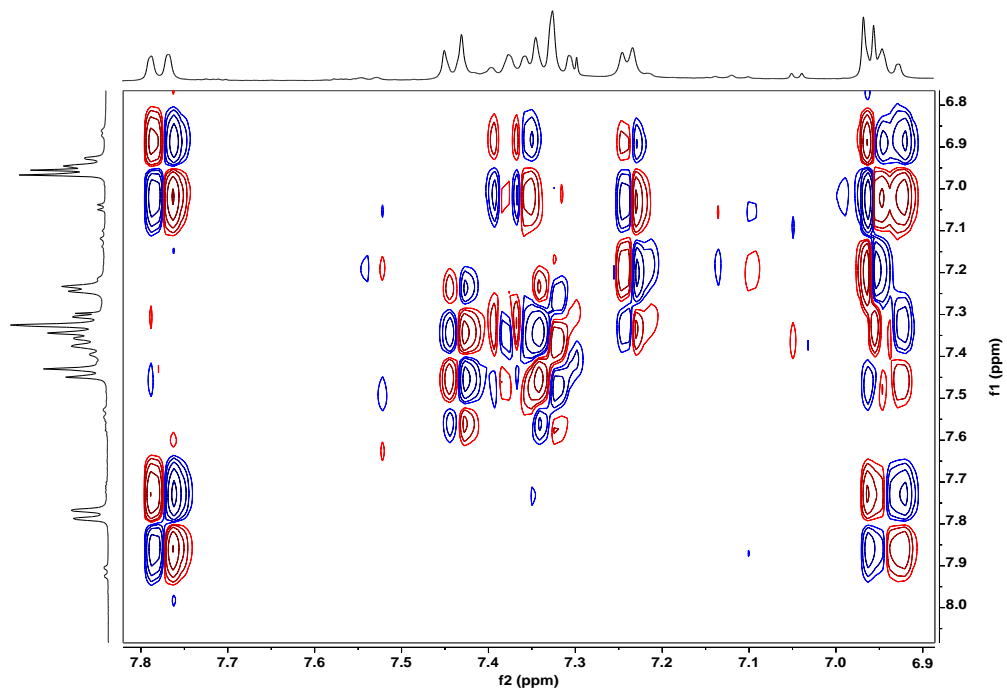

**Figure S7.2.** dqCOSY (400 MHz, 1,1,2,2-tetrachloroethane- $d_2$ ) of Au[MeDPP] (aromatic region).

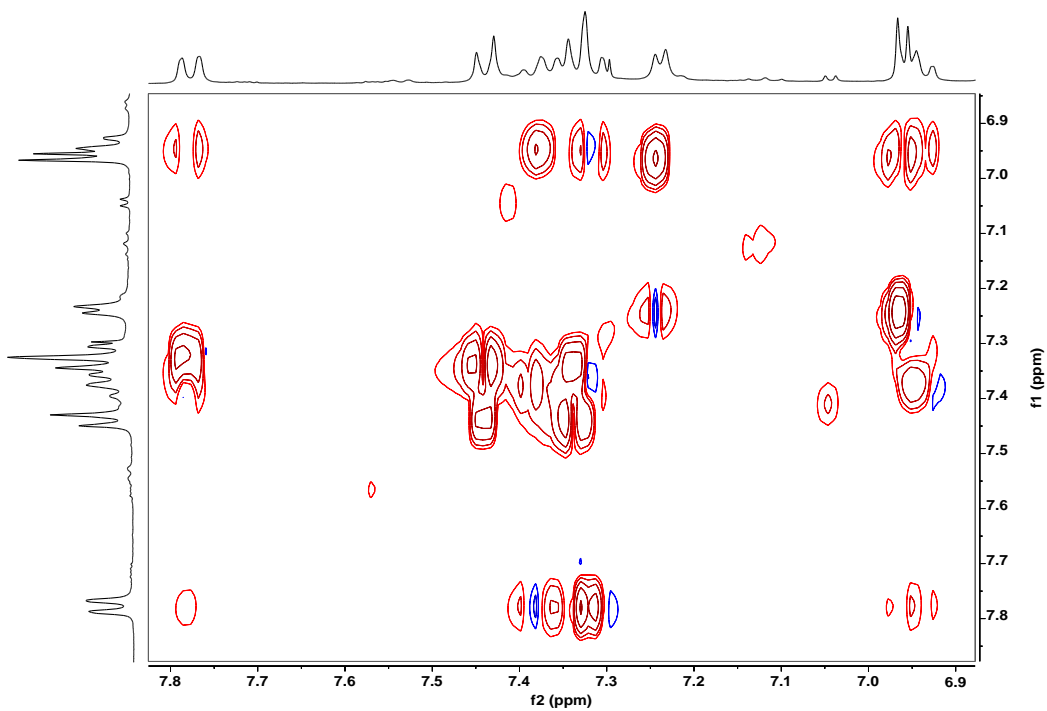

**Figure S7.3.** TOCSY (400 MHz, 1,1,2,2-tetrachloroethane- $d_2$ ) of Au[MeDPP] (aromatic region).

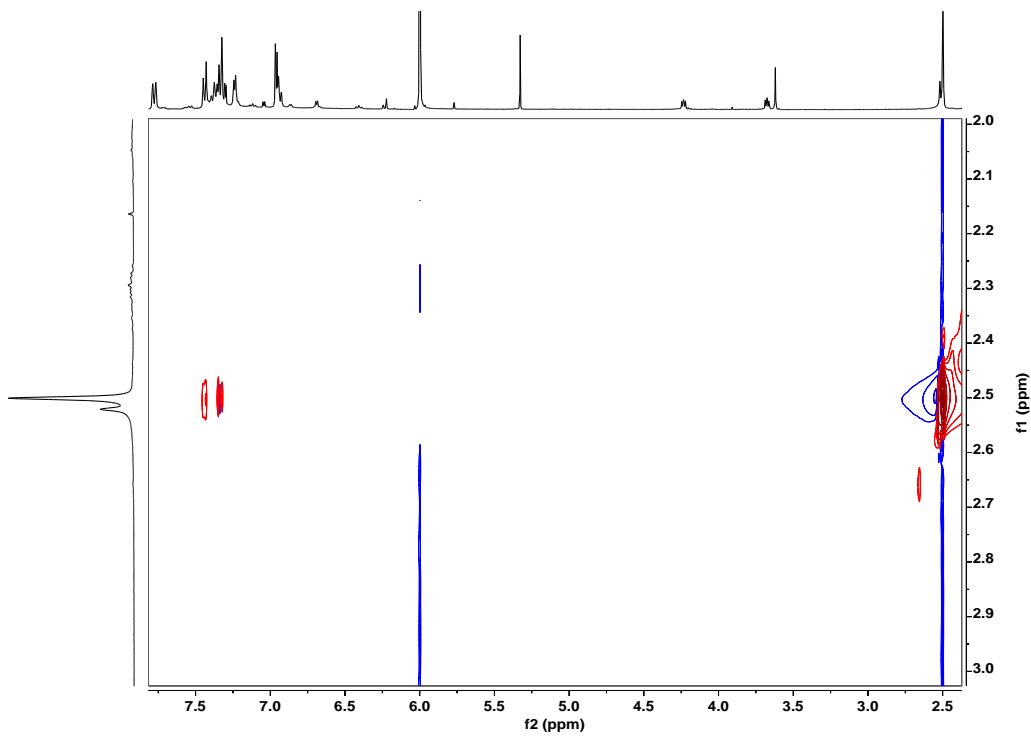

**Figure S7.4.** TOCSY (400 MHz, 1,1,2,2-tetrachloroethane-*d*<sub>2</sub>) of Au[MeDPP] showing correlation between -*p*CH<sub>3</sub> and phenyl protons.

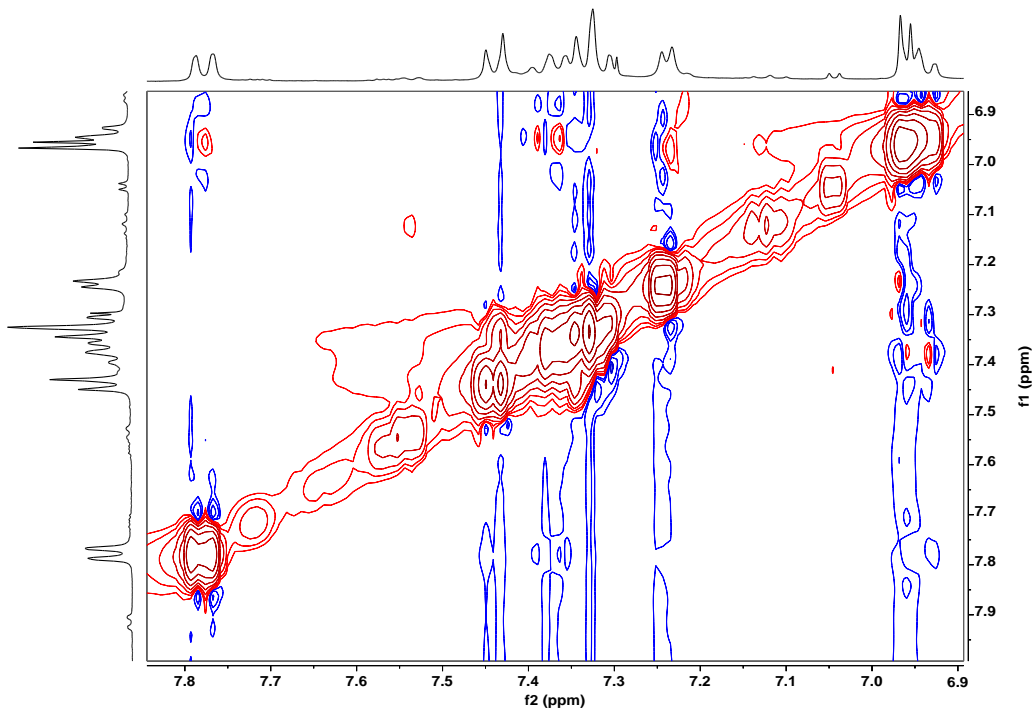

**Figure S7.5.** NOESY (400 MHz, 1,1,2,2-tetrachloroethane-*d*<sub>2</sub>) of Au[MeDPP](aromatic region).

## B. Mass spectra

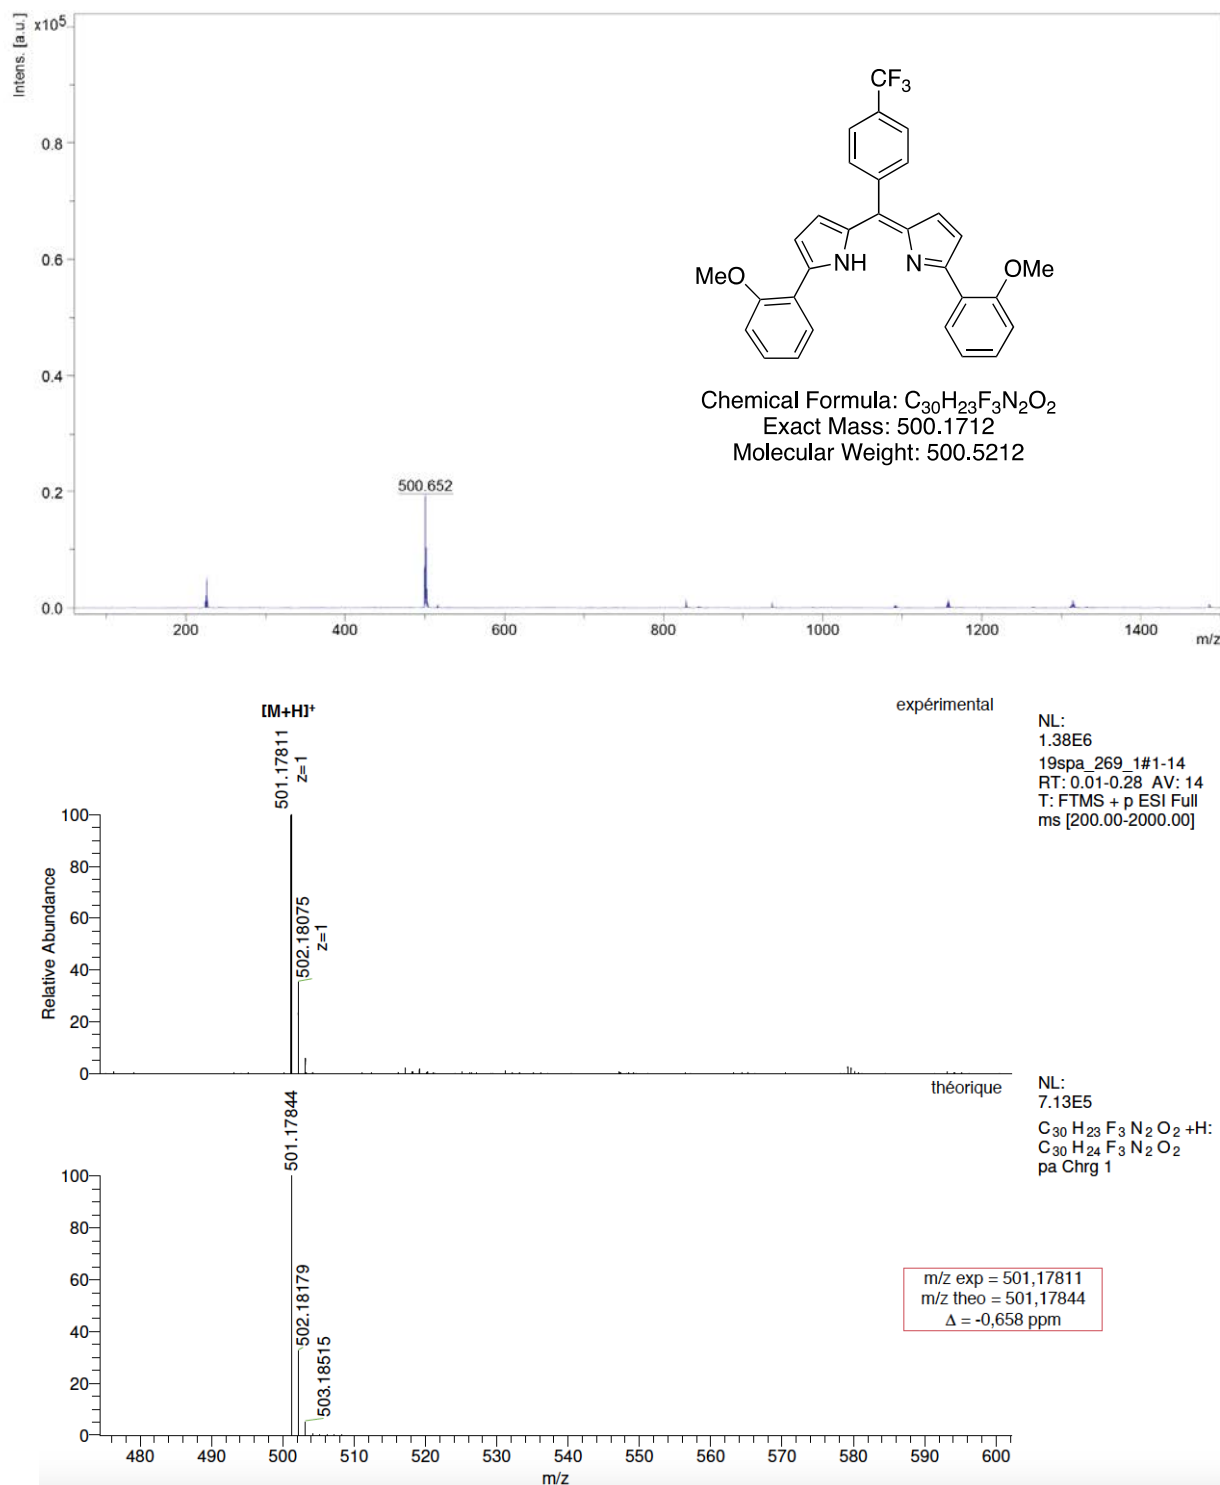

**Figure S8.** MALDI/TOF LRMS and ESI HRMS mass spectra of  $H_3[CF_3DPPOMe]$

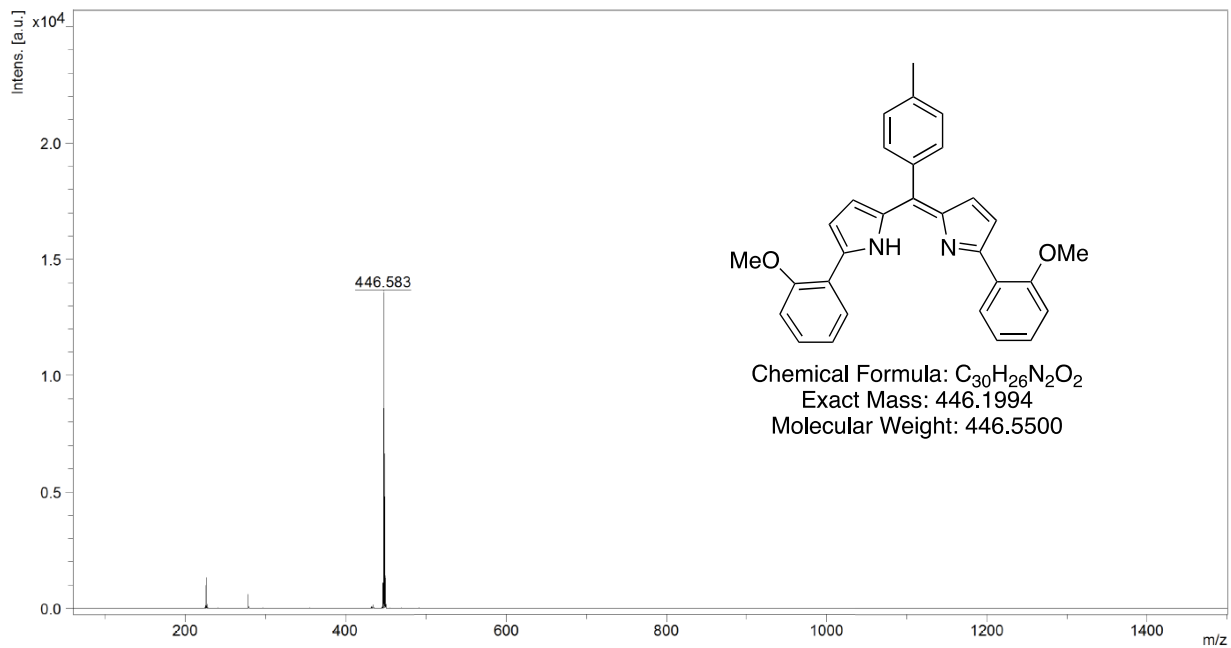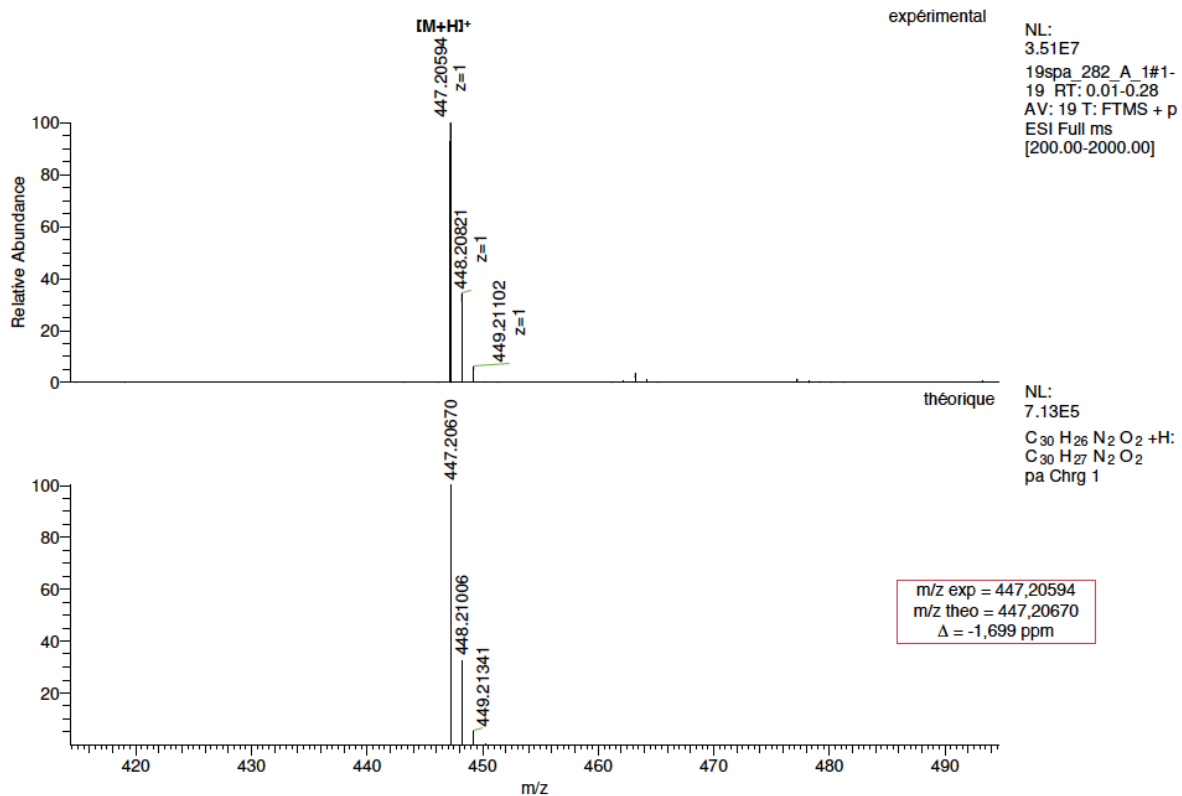

**Figure S9.** MALDI/TOF LRMS and ESI HRMS mass spectra of  $H_3[MeDPPOMe]$ .



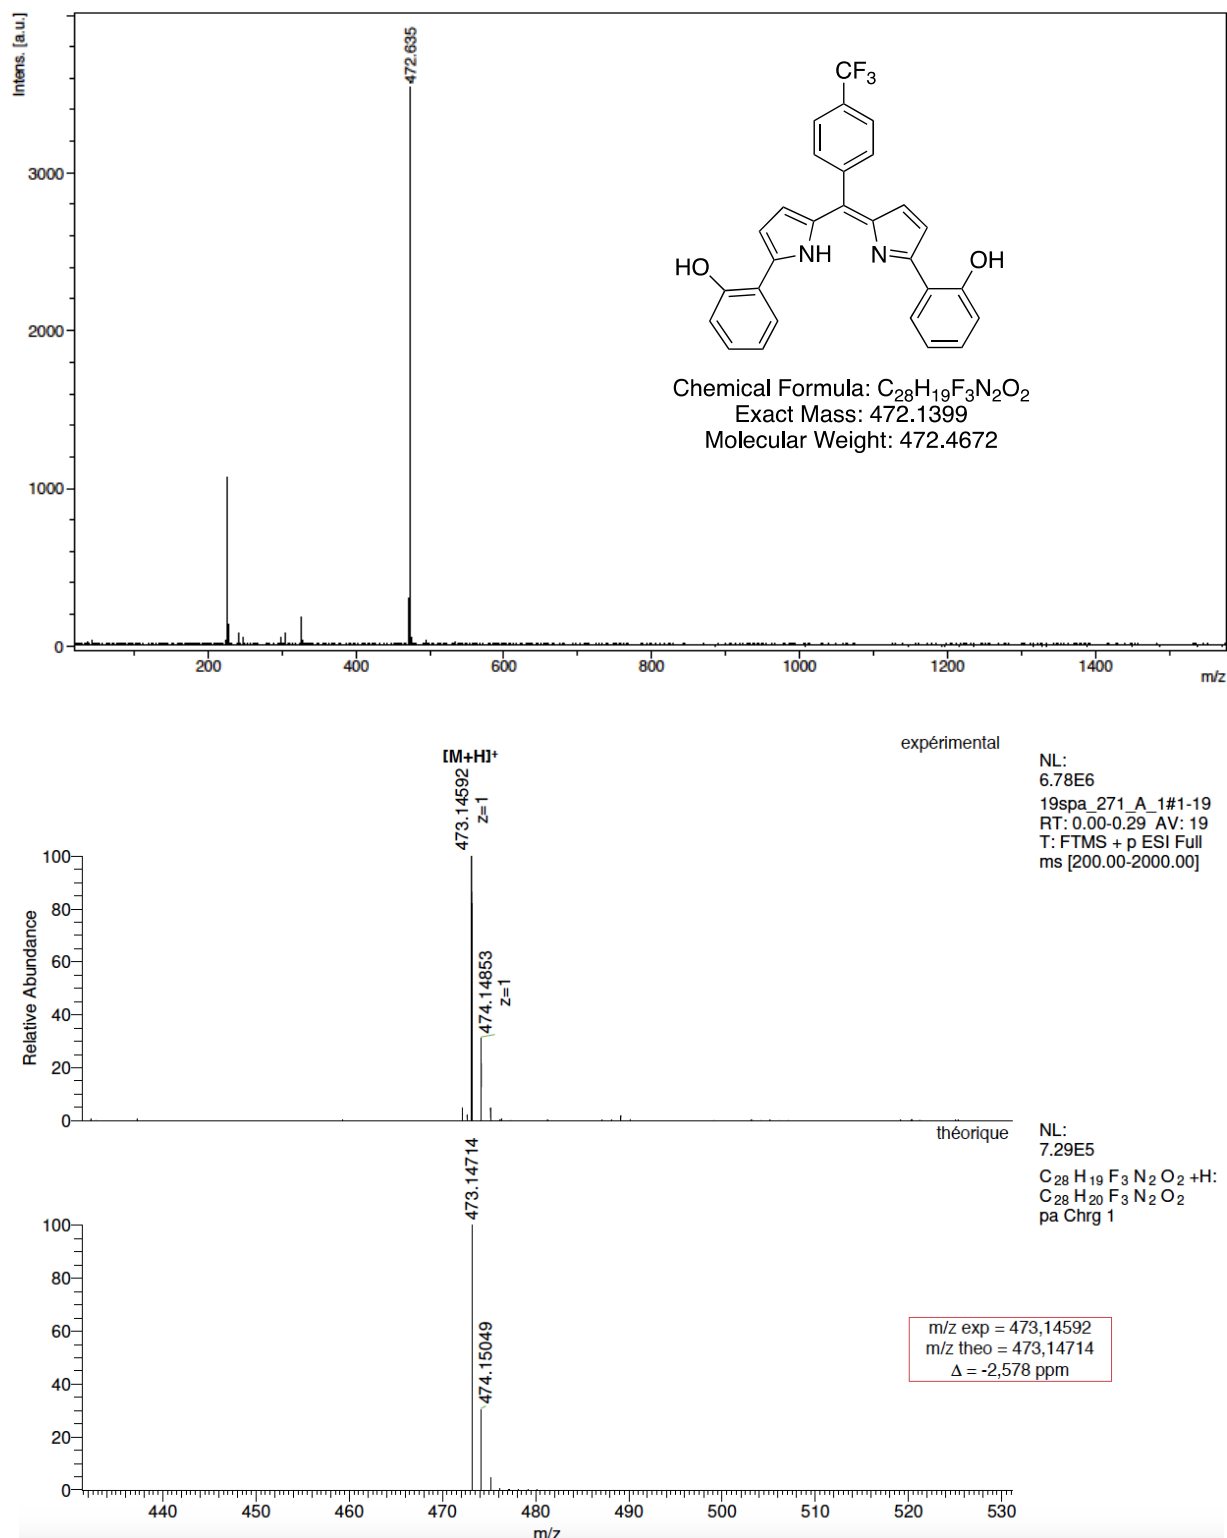

**Figure S10.** MALDI/TOF LRMS and ESI HRMS mass spectra of **H<sub>3</sub>[CF<sub>3</sub>DPP]**.

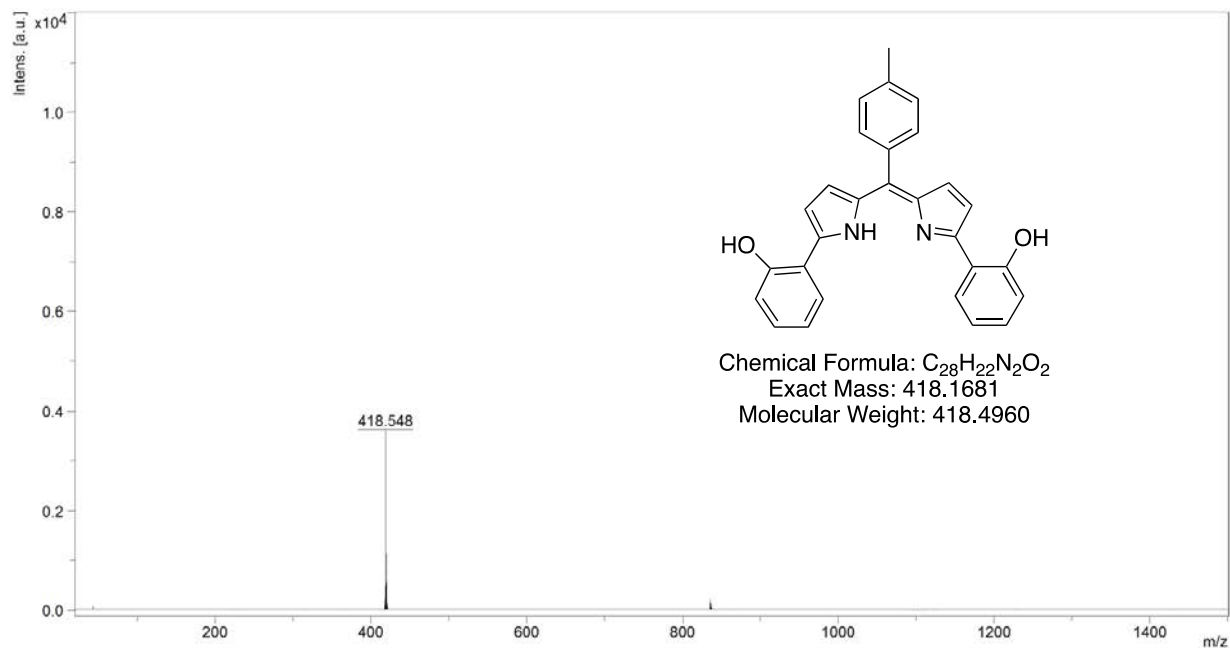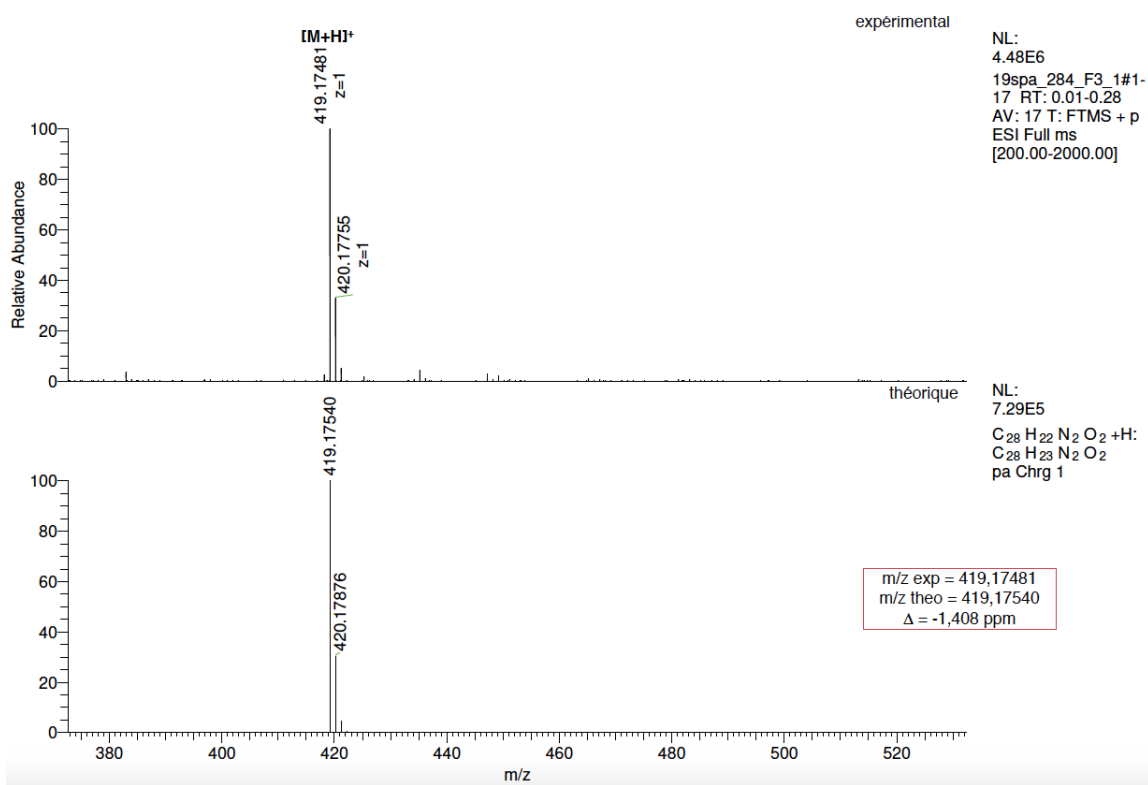

**Figure S11.** MALDI/TOF LRMS and ESI HRMS mass spectra of  $H_3[MeDPP]$ .

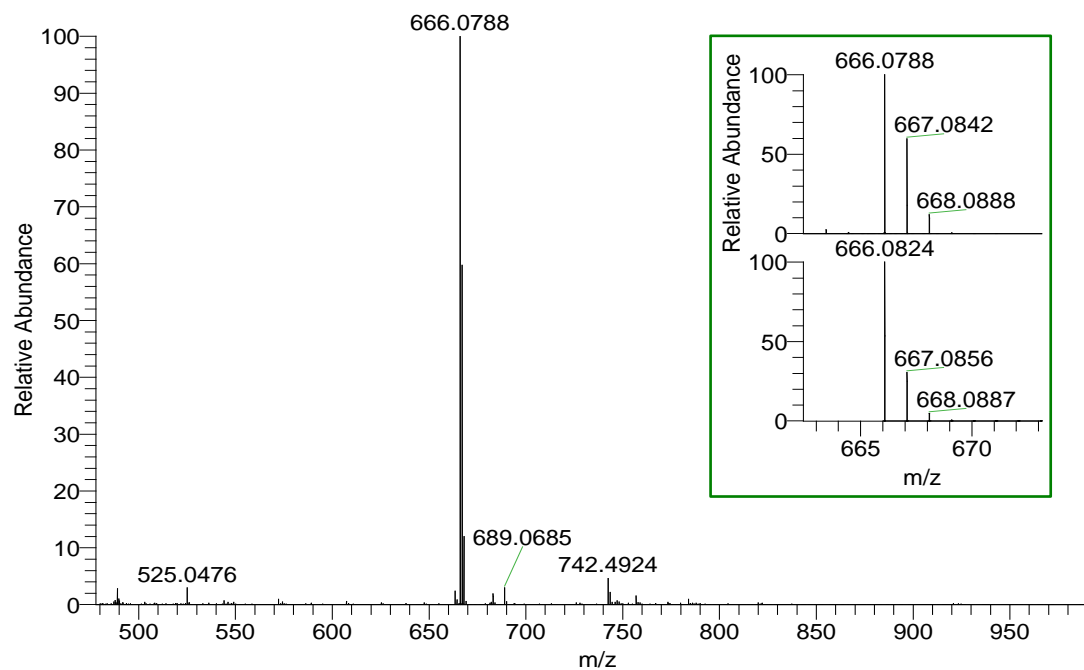

**Figure S12.** Positive-mode ESI mass spectrum of Au[CF<sub>3</sub>DPP]. Insert: Detail of the molecular ion peak (top) and simulation (bottom).

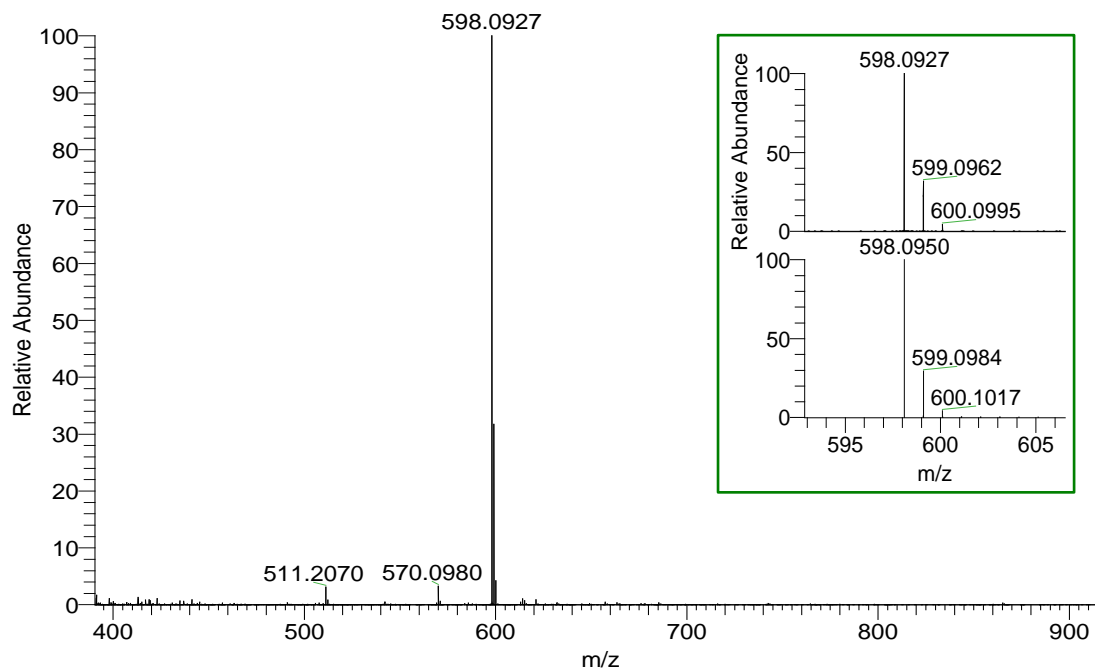

**Figure S13.** Positive-mode ESI mass spectrum of Au[HDPP]. Insert: Detail of the molecular ion peak (top) and simulation (bottom).

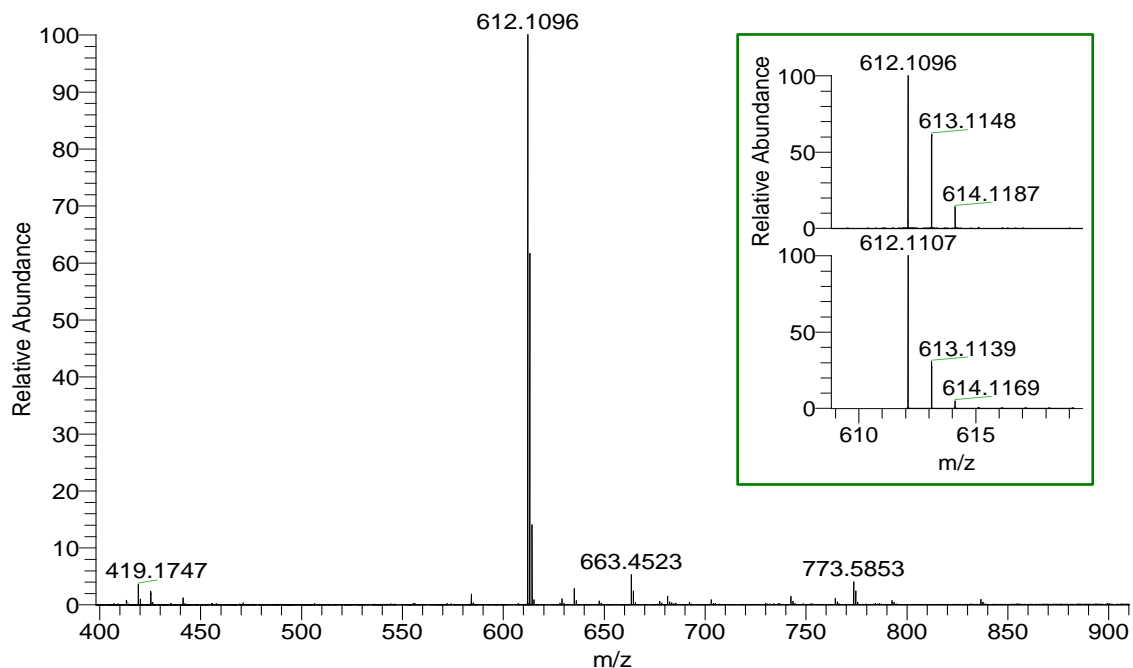

**Figure S14.** Positive-mode ESI mass spectrum of **Au[MeDPP]**. Insert: Detail of the molecular ion peak (top) and simulation (bottom).

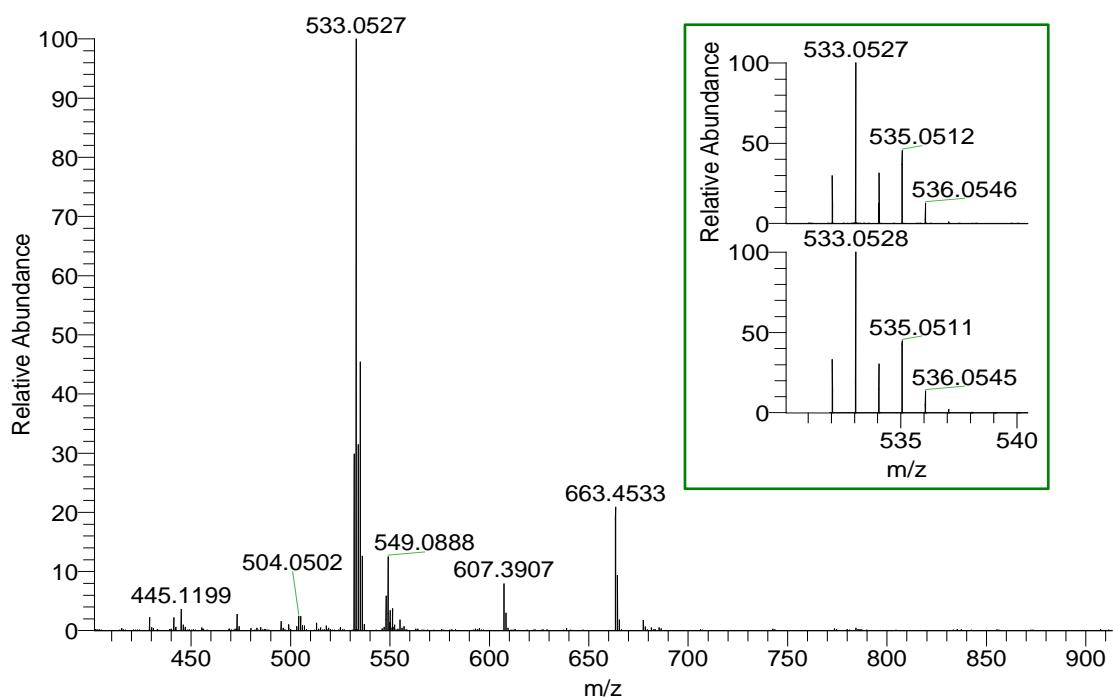

**Figure S15.** Positive-mode ESI mass spectrum of **Cu[CF<sub>3</sub>DPP]**. Insert: Detail of the molecular ion peaks (top) and simulation (bottom) for  $[M]^+$  and  $[M+H]^+$  mixture.

## C. Redox potentials

**Table 1.** Redox potentials (V vs SCE) for Au[XDPP] (X = CF<sub>3</sub>, H and CH<sub>3</sub>) in benzonitrile with 0.1M TBAP. Scan rate: 0.1Vs<sup>-1</sup>.

| Dipyrrin                | $E_{1/2ox1}$ | $E_{1/2ox2}$ | $E_{1/2red1}$ | $E_{1/2red2}$ |
|-------------------------|--------------|--------------|---------------|---------------|
| Au[CF <sub>3</sub> DPP] | 0.98         | 1.42         | -0.86         | -             |
| Au[HDPP]                | 0.96         | 1.43         | -0.89         | -             |
| Au[MeDPP]               | 0.95         | 1.42         | -0.91         |               |

**Table 2.** Redox potentials (V vs SCE) for Au[XDPP] (X = CF<sub>3</sub>, H and CH<sub>3</sub>) in CH<sub>2</sub>Cl<sub>2</sub> with 0.1M TBAP. Scan rate: 0.1Vs<sup>-1</sup>.

| Dipyrrin                | $E_{1/2ox1}$ | $E_{1/2ox2}$ | $E_{1/2red1}$ | $E_{1/2red2}$ |
|-------------------------|--------------|--------------|---------------|---------------|
| Au[CF <sub>3</sub> DPP] | 1.01         | 1.43         | -0.86         | -             |
| Au[HDPP]                | 0.96         | 1.41         | -0.91         | -             |
| Au[MeDPP]               | 0.97         | 1.42         | -0.88         | -             |

**Table 3.** Redox potentials (V vs SCE) for Cu[CF<sub>3</sub>DPP] in benzonitrile and CH<sub>2</sub>Cl<sub>2</sub> with 0.1M TBAP. Scan rate: 0.05Vs<sup>-1</sup>.

| Solvent                         | $E_{1/2ox1}$ | $E_{1/2ox2}$ | $E_{1/2red1}$ | $E_{1/2red2}$ |
|---------------------------------|--------------|--------------|---------------|---------------|
| Benzonitrile                    | 0.75         | -            | -0.23         | -             |
| CH <sub>2</sub> Cl <sub>2</sub> | irrev        | 0.79         | -0.20         | -             |

## D. Optimized OLYP/ZORA-STO-TZ2P coordinates (Å)

1 Au(DPP), S = 0, C<sub>2</sub>

|    |              |              |              |
|----|--------------|--------------|--------------|
| Au | 0.000000000  | 0.000000000  | -1.181949000 |
| C  | 0.000000000  | 0.000000000  | 2.218165000  |
| C  | 0.000000000  | 0.000000000  | 3.720415000  |
| C  | 0.000000000  | 0.000000000  | 6.529848000  |
| C  | 0.297044000  | 1.167982000  | 5.828208000  |
| C  | 0.298294000  | 1.168417000  | 4.433502000  |
| C  | 1.228561000  | -0.203363000 | 1.574928000  |
| C  | 2.494722000  | -0.421254000 | 2.183640000  |
| C  | 2.593010000  | -0.393765000 | -2.598728000 |
| C  | 2.751162000  | -0.431075000 | -0.070787000 |
| C  | 3.271906000  | -0.478543000 | -3.838555000 |
| C  | 3.345707000  | -0.501502000 | -1.389669000 |
| C  | 3.423935000  | -0.558852000 | 1.182039000  |
| C  | 4.639415000  | -0.660703000 | -3.900171000 |
| C  | 4.746884000  | -0.684874000 | -1.502574000 |
| C  | 5.390924000  | -0.764491000 | -2.720651000 |
| C  | -0.297044000 | -1.167982000 | 5.828208000  |
| C  | -0.298294000 | -1.168417000 | 4.433502000  |
| C  | -1.228561000 | 0.203363000  | 1.574928000  |
| C  | -2.494722000 | 0.421254000  | 2.183640000  |
| C  | -2.593010000 | 0.393765000  | -2.598728000 |
| C  | -2.751162000 | 0.431075000  | -0.070787000 |
| C  | -3.271906000 | 0.478543000  | -3.838555000 |
| C  | -3.345707000 | 0.501502000  | -1.389669000 |
| C  | -3.423935000 | 0.558852000  | 1.182039000  |
| C  | -4.639415000 | 0.660703000  | -3.900171000 |
| C  | -4.746884000 | 0.684874000  | -1.502574000 |
| C  | -5.390924000 | 0.764491000  | -2.720651000 |
| H  | 0.000000000  | 0.000000000  | 7.617486000  |
| H  | 0.528444000  | 2.084553000  | 6.366225000  |
| H  | 0.529838000  | 2.082721000  | 3.893163000  |
| H  | 2.670679000  | -0.466593000 | 3.248829000  |
| H  | 2.672072000  | -0.394002000 | -4.739952000 |
| H  | 4.480668000  | -0.736488000 | 1.316137000  |
| H  | 5.128313000  | -0.721250000 | -4.870139000 |
| H  | 5.339619000  | -0.763869000 | -0.598338000 |
| H  | 6.467660000  | -0.904520000 | -2.759482000 |
| H  | -0.528444000 | -2.084553000 | 6.366225000  |
| H  | -0.529838000 | -2.082721000 | 3.893163000  |
| H  | -2.670679000 | 0.466593000  | 3.248829000  |

|   |              |              |              |
|---|--------------|--------------|--------------|
| H | -2.672072000 | 0.394002000  | -4.739952000 |
| H | -4.480668000 | 0.736488000  | 1.316137000  |
| H | -5.128313000 | 0.721250000  | -4.870139000 |
| H | -5.339619000 | 0.763869000  | -0.598338000 |
| H | -6.467660000 | 0.904520000  | -2.759482000 |
| N | 1.431381000  | -0.221302000 | 0.194528000  |
| N | -1.431381000 | 0.221302000  | 0.194528000  |
| O | 1.279642000  | -0.221908000 | -2.701473000 |
| O | -1.279642000 | 0.221908000  | -2.701473000 |

**2 Au(DPP), S = 0, C<sub>2v</sub>**

|    |              |              |              |
|----|--------------|--------------|--------------|
| Au | 0.000000000  | 0.000000000  | -0.895595000 |
| C  | 0.000000000  | 0.000000000  | 2.506117000  |
| C  | 0.000000000  | 0.000000000  | 4.008957000  |
| C  | 0.000000000  | 0.000000000  | 6.819175000  |
| C  | 0.000000000  | 1.204804000  | 6.117241000  |
| C  | 0.000000000  | 1.205544000  | 4.722439000  |
| C  | 0.000000000  | -1.204804000 | 6.117241000  |
| C  | 0.000000000  | -1.205544000 | 4.722439000  |
| C  | 1.245112000  | 0.000000000  | 1.862773000  |
| C  | 2.529319000  | 0.000000000  | 2.472417000  |
| C  | 2.623674000  | 0.000000000  | -2.309770000 |
| C  | 2.785044000  | 0.000000000  | 0.218204000  |
| C  | 3.308753000  | 0.000000000  | -3.549030000 |
| C  | 3.383700000  | 0.000000000  | -1.100440000 |
| C  | 3.469157000  | 0.000000000  | 1.471309000  |
| C  | 4.688084000  | 0.000000000  | -3.610627000 |
| C  | 4.796948000  | 0.000000000  | -1.213286000 |
| C  | 5.446563000  | 0.000000000  | -2.430908000 |
| C  | -1.245112000 | 0.000000000  | 1.862773000  |
| C  | -2.529319000 | 0.000000000  | 2.472417000  |
| C  | -2.623674000 | 0.000000000  | -2.309770000 |
| C  | -2.785044000 | 0.000000000  | 0.218204000  |
| C  | -3.308753000 | 0.000000000  | -3.549030000 |
| C  | -3.383700000 | 0.000000000  | -1.100440000 |
| C  | -3.469157000 | 0.000000000  | 1.471309000  |
| C  | -4.688084000 | 0.000000000  | -3.610627000 |
| C  | -4.796948000 | 0.000000000  | -1.213286000 |
| C  | -5.446563000 | 0.000000000  | -2.430908000 |
| H  | 0.000000000  | 0.000000000  | 7.906800000  |
| H  | 0.000000000  | 2.149112000  | 4.182497000  |
| H  | 0.000000000  | 2.150328000  | 6.655291000  |
| H  | 0.000000000  | -2.149112000 | 4.182497000  |
| H  | 0.000000000  | -2.150328000 | 6.655291000  |

|   |              |             |              |
|---|--------------|-------------|--------------|
| H | 2.703321000  | 0.000000000 | -4.450699000 |
| H | 2.709476000  | 0.000000000 | 3.537909000  |
| H | 4.540585000  | 0.000000000 | 1.606172000  |
| H | 5.180779000  | 0.000000000 | -4.580596000 |
| H | 5.394544000  | 0.000000000 | -0.308710000 |
| H | 6.532317000  | 0.000000000 | -2.469662000 |
| H | -2.703321000 | 0.000000000 | -4.450699000 |
| H | -2.709476000 | 0.000000000 | 3.537909000  |
| H | -4.540585000 | 0.000000000 | 1.606172000  |
| H | -5.180779000 | 0.000000000 | -4.580596000 |
| H | -5.394544000 | 0.000000000 | -0.308710000 |
| H | -6.532317000 | 0.000000000 | -2.469662000 |
| N | 1.448705000  | 0.000000000 | 0.482358000  |
| N | -1.448705000 | 0.000000000 | 0.482358000  |
| O | 1.299314000  | 0.000000000 | -2.414134000 |
| O | -1.299314000 | 0.000000000 | -2.414134000 |

### 3 Au(DPP)<sup>-</sup>, S = ½, C<sub>2</sub>

|    |              |              |              |
|----|--------------|--------------|--------------|
| Au | 0.000000000  | 0.000000000  | -1.204435000 |
| C  | 0.000000000  | 0.000000000  | 2.209587000  |
| C  | 0.000000000  | 0.000000000  | 3.702916000  |
| C  | 0.000000000  | 0.000000000  | 6.530551000  |
| C  | 0.389560000  | -1.139211000 | 5.824167000  |
| C  | 0.393155000  | -1.136675000 | 4.430147000  |
| C  | 1.245081000  | -0.194694000 | 1.568302000  |
| C  | 2.536498000  | -0.139685000 | 2.163849000  |
| C  | 2.598578000  | -0.665504000 | -2.615469000 |
| C  | 2.766572000  | -0.480229000 | -0.068734000 |
| C  | 3.317822000  | -0.770809000 | -3.837742000 |
| C  | 3.349483000  | -0.690343000 | -1.385746000 |
| C  | 3.467304000  | -0.301071000 | 1.157289000  |
| C  | 4.686916000  | -0.963341000 | -3.879922000 |
| C  | 4.747789000  | -0.889238000 | -1.481089000 |
| C  | 5.417001000  | -1.030995000 | -2.685341000 |
| C  | -0.389560000 | 1.139211000  | 5.824167000  |
| C  | -0.393155000 | 1.136675000  | 4.430147000  |
| C  | -1.245081000 | 0.194694000  | 1.568302000  |
| C  | -2.536498000 | 0.139685000  | 2.163849000  |
| C  | -2.598578000 | 0.665504000  | -2.615469000 |
| C  | -2.766572000 | 0.480229000  | -0.068734000 |
| C  | -3.317822000 | 0.770809000  | -3.837742000 |
| C  | -3.349483000 | 0.690343000  | -1.385746000 |
| C  | -3.467304000 | 0.301071000  | 1.157289000  |
| C  | -4.686916000 | 0.963341000  | -3.879922000 |



|   |              |              |              |
|---|--------------|--------------|--------------|
| C | -4.747789000 | 0.889238000  | -1.481089000 |
| C | -5.417001000 | 1.030995000  | -2.685341000 |
| H | 0.000000000  | 0.000000000  | 7.619054000  |
| H | 0.689762000  | -2.037411000 | 6.361544000  |
| H | 0.696558000  | -2.028520000 | 3.888583000  |
| H | 2.729845000  | -0.718472000 | -4.750875000 |
| H | 2.738408000  | 0.052814000  | 3.208797000  |
| H | 4.541405000  | -0.299541000 | 1.285069000  |
| H | 5.189793000  | -1.065146000 | -4.840998000 |
| H | 5.325661000  | -0.944320000 | -0.563899000 |
| H | 6.492941000  | -1.191933000 | -2.696281000 |
| H | -0.689762000 | 2.037411000  | 6.361544000  |
| H | -0.696558000 | 2.028520000  | 3.888583000  |
| H | -2.729845000 | 0.718472000  | -4.750875000 |
| H | -2.738408000 | -0.052814000 | 3.208797000  |
| H | -4.541405000 | 0.299541000  | 1.285069000  |
| H | -5.189793000 | 1.065146000  | -4.840998000 |
| H | -5.325661000 | 0.944320000  | -0.563899000 |
| H | -6.492941000 | 1.191933000  | -2.696281000 |
| N | 1.426918000  | -0.432220000 | 0.206441000  |
| N | -1.426918000 | 0.432220000  | 0.206441000  |
| O | 1.290711000  | -0.567625000 | -2.734267000 |
| O | -1.290711000 | 0.567625000  | -2.734267000 |

**4 Au(DPP)<sup>+</sup>, S = ½, C<sub>2</sub>**

|    |              |              |              |
|----|--------------|--------------|--------------|
| Au | 0.000000000  | 0.000000000  | -1.181588000 |
| C  | 0.000000000  | 0.000000000  | 2.223357000  |
| C  | 0.000000000  | 0.000000000  | 3.721766000  |
| C  | 0.000000000  | 0.000000000  | 6.527058000  |
| C  | 0.158125000  | -1.195601000 | 5.826902000  |
| C  | 0.164271000  | -1.197884000 | 4.432648000  |
| C  | 1.227402000  | -0.190501000 | 1.564457000  |
| C  | 2.515019000  | -0.345369000 | 2.177620000  |
| C  | 2.573294000  | -0.460565000 | -2.603142000 |
| C  | 2.747555000  | -0.438234000 | -0.078455000 |
| C  | 3.240180000  | -0.606090000 | -3.847271000 |
| C  | 3.333459000  | -0.551718000 | -1.377833000 |
| C  | 3.435449000  | -0.500355000 | 1.184410000  |
| C  | 4.597108000  | -0.819824000 | -3.898775000 |
| C  | 4.735634000  | -0.772269000 | -1.492618000 |
| C  | 5.356394000  | -0.902345000 | -2.710698000 |
| C  | -0.158125000 | 1.195601000  | 5.826902000  |
| C  | -0.164271000 | 1.197884000  | 4.432648000  |
| C  | -1.227402000 | 0.190501000  | 1.564457000  |

|   |              |              |              |
|---|--------------|--------------|--------------|
| C | -2.515019000 | 0.345369000  | 2.177620000  |
| C | -2.573294000 | 0.460565000  | -2.603142000 |
| C | -2.747555000 | 0.438234000  | -0.078455000 |
| C | -3.240180000 | 0.606090000  | -3.847271000 |
| C | -3.333459000 | 0.551718000  | -1.377833000 |
| C | -3.435449000 | 0.500355000  | 1.184410000  |
| C | -4.597108000 | 0.819824000  | -3.898775000 |
| C | -4.735634000 | 0.772269000  | -1.492618000 |
| C | -5.356394000 | 0.902345000  | -2.710698000 |
| H | 0.000000000  | 0.000000000  | 7.614132000  |
| H | 0.276346000  | -2.132720000 | 6.365230000  |
| H | 0.282084000  | -2.135958000 | 3.896404000  |
| H | 2.639058000  | -0.536324000 | -4.748309000 |
| H | 2.695907000  | -0.332344000 | 3.242439000  |
| H | 4.498057000  | -0.637946000 | 1.316971000  |
| H | 5.086974000  | -0.924572000 | -4.863735000 |
| H | 5.334803000  | -0.844049000 | -0.593314000 |
| H | 6.428129000  | -1.071055000 | -2.758801000 |
| H | -0.276346000 | 2.132720000  | 6.365230000  |
| H | -0.282084000 | 2.135958000  | 3.896404000  |
| H | -2.639058000 | 0.536324000  | -4.748309000 |
| H | -2.695907000 | 0.332344000  | 3.242439000  |
| H | -4.498057000 | 0.637946000  | 1.316971000  |
| H | -5.086974000 | 0.924572000  | -4.863735000 |
| H | -5.334803000 | 0.844049000  | -0.593314000 |
| H | -6.428129000 | 1.071055000  | -2.758801000 |
| N | 1.418150000  | -0.251220000 | 0.192739000  |
| N | -1.418150000 | 0.251220000  | 0.192739000  |
| O | 1.278420000  | -0.244369000 | -2.696570000 |
| O | -1.278420000 | 0.244369000  | -2.696570000 |

**5 Cu(DPP), S = 1, C<sub>2</sub>**

|    |             |              |              |
|----|-------------|--------------|--------------|
| Cu | 0.000000000 | 0.000000000  | -1.147756000 |
| C  | 0.000000000 | 0.000000000  | 2.203197000  |
| C  | 0.000000000 | 0.000000000  | 3.705114000  |
| C  | 0.000000000 | 0.000000000  | 6.517993000  |
| C  | 0.021966000 | -1.204496000 | 5.815629000  |
| C  | 0.024029000 | -1.204859000 | 4.420780000  |
| C  | 1.231740000 | -0.179702000 | 1.548654000  |
| C  | 2.513460000 | -0.335529000 | 2.184187000  |
| C  | 2.519022000 | -0.486928000 | -2.580655000 |
| C  | 2.734796000 | -0.415023000 | -0.066322000 |
| C  | 3.190594000 | -0.639976000 | -3.836182000 |
| C  | 3.319275000 | -0.534455000 | -1.368290000 |

|   |              |              |              |
|---|--------------|--------------|--------------|
| C | 3.438378000  | -0.480352000 | 1.193958000  |
| C | 4.550472000  | -0.812481000 | -3.908482000 |
| C | 4.721763000  | -0.713628000 | -1.503732000 |
| C | 5.330745000  | -0.848036000 | -2.730561000 |
| C | -0.021966000 | 1.204496000  | 5.815629000  |
| C | -0.024029000 | 1.204859000  | 4.420780000  |
| C | -1.231740000 | 0.179702000  | 1.548654000  |
| C | -2.513460000 | 0.335529000  | 2.184187000  |
| C | -2.519022000 | 0.486928000  | -2.580655000 |
| C | -2.734796000 | 0.415023000  | -0.066322000 |
| C | -3.190594000 | 0.639976000  | -3.836182000 |
| C | -3.319275000 | 0.534455000  | -1.368290000 |
| C | -3.438378000 | 0.480352000  | 1.193958000  |
| C | -4.550472000 | 0.812481000  | -3.908482000 |
| C | -4.721763000 | 0.713628000  | -1.503732000 |
| C | -5.330745000 | 0.848036000  | -2.730561000 |
| H | 0.000000000  | 0.000000000  | 7.605583000  |
| H | 0.037156000  | -2.149924000 | 6.353501000  |
| H | 0.039800000  | -2.148575000 | 3.881476000  |
| H | 2.570669000  | -0.605704000 | -4.727514000 |
| H | 2.689556000  | -0.332771000 | 3.250614000  |
| H | 4.501360000  | -0.620288000 | 1.328212000  |
| H | 5.031586000  | -0.920670000 | -4.878547000 |
| H | 5.338525000  | -0.744871000 | -0.612385000 |
| H | 6.407565000  | -0.981342000 | -2.791558000 |
| H | -0.037156000 | 2.149924000  | 6.353501000  |
| H | -0.039800000 | 2.148575000  | 3.881476000  |
| H | -2.570669000 | 0.605704000  | -4.727514000 |
| H | -2.689556000 | 0.332771000  | 3.250614000  |
| H | -4.501360000 | 0.620288000  | 1.328212000  |
| H | -5.031586000 | 0.920670000  | -4.878547000 |
| H | -5.338525000 | 0.744871000  | -0.612385000 |
| H | -6.407565000 | 0.981342000  | -2.791558000 |
| N | 1.406273000  | -0.229272000 | 0.178260000  |
| N | -1.406273000 | 0.229272000  | 0.178260000  |
| O | 1.241844000  | -0.313101000 | -2.610449000 |
| O | -1.241844000 | 0.313101000  | -2.610449000 |
